# Supplementary material for: Fostering clinical reasoning in physiotherapy: comparing the effects of concept map study and concept map completion after example study in novice and advanced learners
Source: PubMed Central journal article supplement (PMC5709960; doi:10.1186/s12909-017-1076-z), 2017-12-01
Supplement: 12909_2017_1076_MOESM1_ESM.pdf [file 12909_2017_1076_MOESM1_ESM.pdf]

**How do you choose an appropriate electrotherapeutic current for a motor deficit?**

**Voluntary muscle activation disorders**

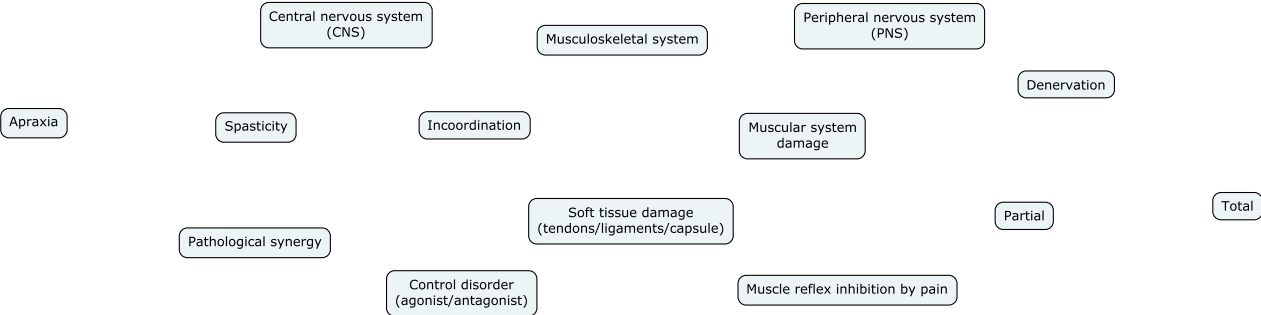

Functional movements rehabilitation

Conventional neuromuscular stimulation

Monophasic triangular wave

Muscle weakness    Muscle injury    Superficial muscles or midplane    Small muscle

Inhibition of the agonist muscle (spastic muscle)

Russian current

Monophasic rectangular wave

Recruitment of the antagonist muscle (of the spastic muscle)

High voltage

20 passive contractions  
40 active contractions  
Pulse duration: duration of the triangular impulsion at or beyond the threshold of accommodation  
OFF: 5000 ms

Neurostimulation of the antagonist muscle

Pen electrode

Nerve motor point    Muscular motor point    Deep muscles    Large muscle

**ENDURANCE**  
Frequency: 20 Hz  
ON/OFF 1:2

**Strength**  
Frequency: 50 Hz  
ON/OFF 1:5

Functional Electrical Stimulation

Bipolar (origin/insertion)

Monopolar (pen electrode)
