# Supplementary material for: Fostering clinical reasoning in physiotherapy: comparing the effects of concept map study and concept map completion after example study in novice and advanced learners
Source: PubMed Central journal article supplement (PMC5709960; doi:10.1186/s12909-017-1076-z), 2017-12-01

**How do you choose an appropriate electrotherapeutic current for a motor deficit?**

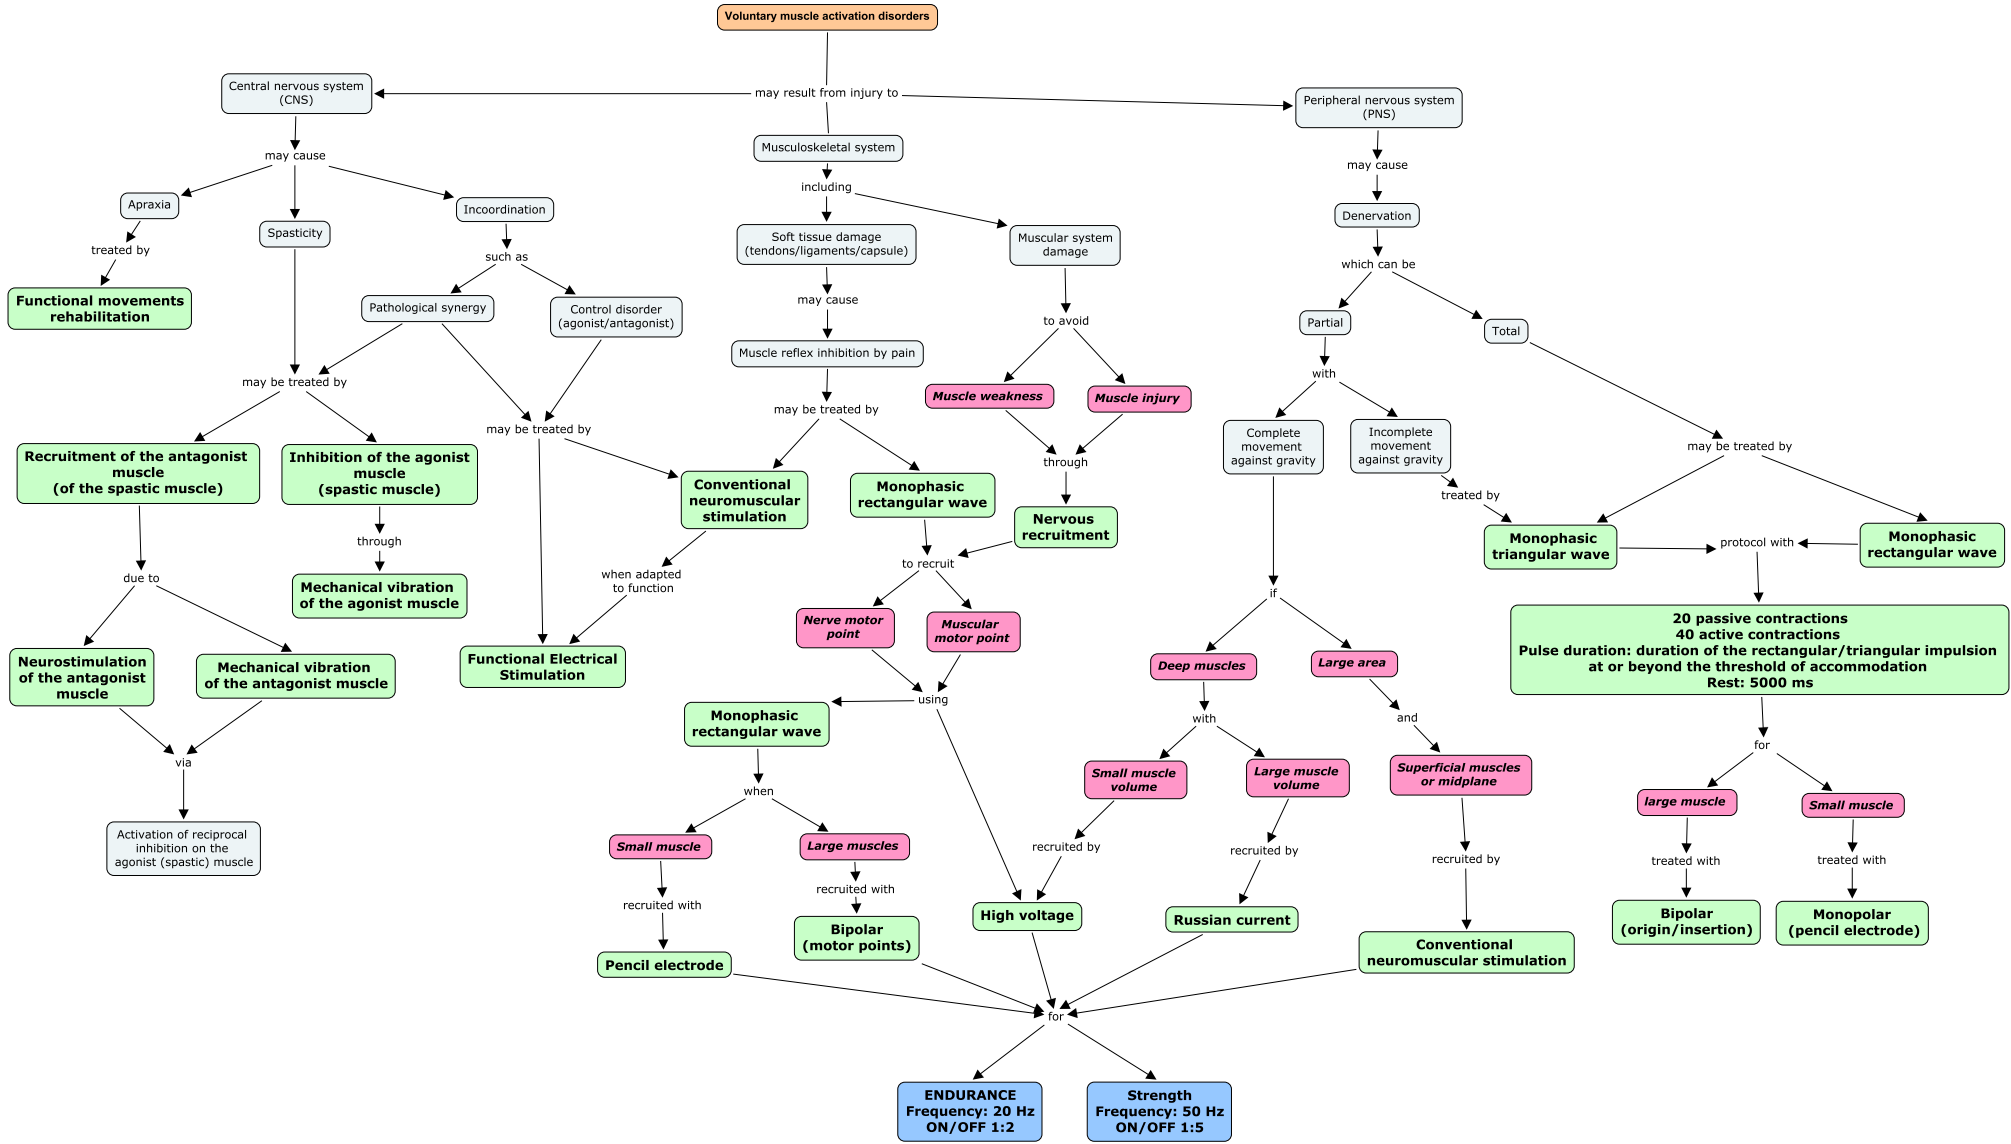

Supplement: 12909_2017_1076_MOESM2_ESM.pdf [file 12909_2017_1076_MOESM2_ESM.pdf]
